# Supplementary material for: Preparing CdS QDs in sodium alginate gel: realizing water solubility and stimuli responsiveness of QDs in an integrative way
Source: Royal Society of Chemistry journal article supplement (doi:10.1039/c8sm02483a), 2019-01-01
Supplement: c8sm02483a1.pdf [file c8sm02483a1.pdf]

1  
2  
3  
4  
5  
6  
7  
8  
9  
10  
11  
12  
13  
14  
15  
16  
17  
18  
19  
20  
21  
22  
23  
24  
25

## Supplementary Information

### **Preparing CdS QDs in sodium alginate gel: realizing water-solubility and stimuli-responsiveness of QDs in an integrative way**

Na Qi, Hui Zhao, Qiaozhi Wang, Yan Qin, Hao Yuan, Ying Li\*

*Key Laboratory of Colloid and Interface Chemistry of State Education Ministry,  
Shandong University, 27 South Road of ShanDa, Jinan, Shandong, 250100, P. R. China*

**Corresponding author:**

Ying Li

Tel:(86) 0531-88362078

Fax: (86) 0531-88364464

Email: [yingli@sdu.edu.cn](mailto:yingli@sdu.edu.cn)

---

26 **Contents:**

27 S1. XRD patterns of the original and purified CdS-SA product.

28 S2. PL spectra of CdS-SA solution with Ba<sup>2+</sup>, Ni<sup>2+</sup>, Al<sup>3+</sup>, Mg<sup>2+</sup>, Ca<sup>2+</sup>,  
29 and Zn<sup>2+</sup> added.

30 S3. TEM image of the CdS-SA solution with Fe<sup>3+</sup>, Ba<sup>2+</sup> and Ni<sup>2+</sup>  
31 added.

32 S4. PL spectra of 0.2 wt% CdS-SA QDs in different mediums (PBS;  
33 DMEM + 10% FBS).

34

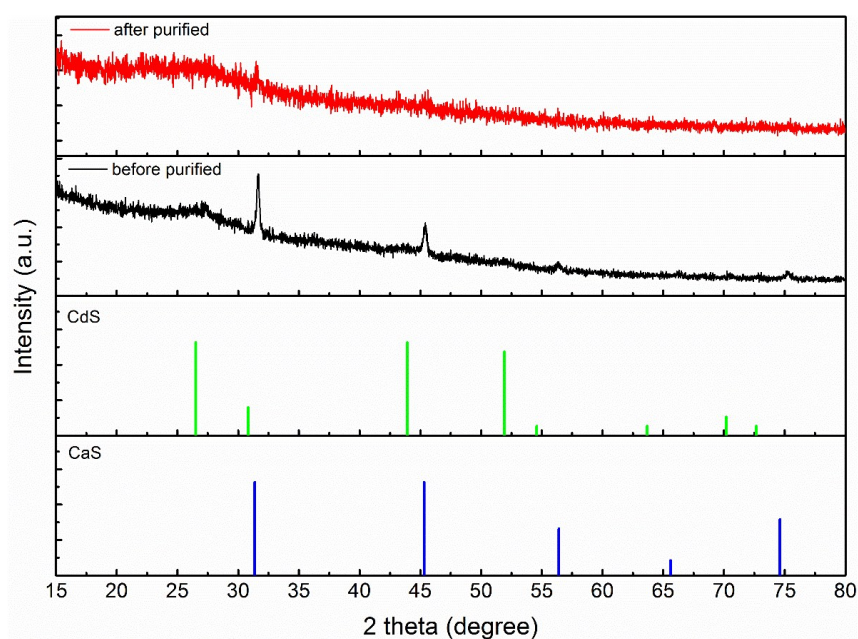

35

36 Fig. S1 XRD patterns of the original and purified CdS-SA product.

37

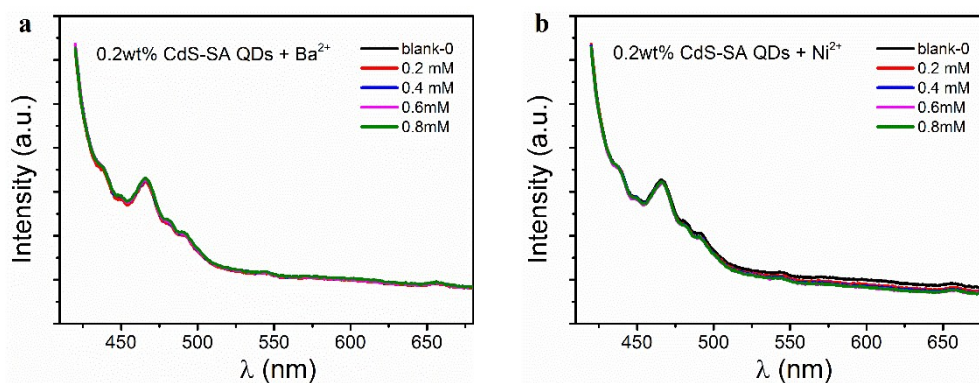

38

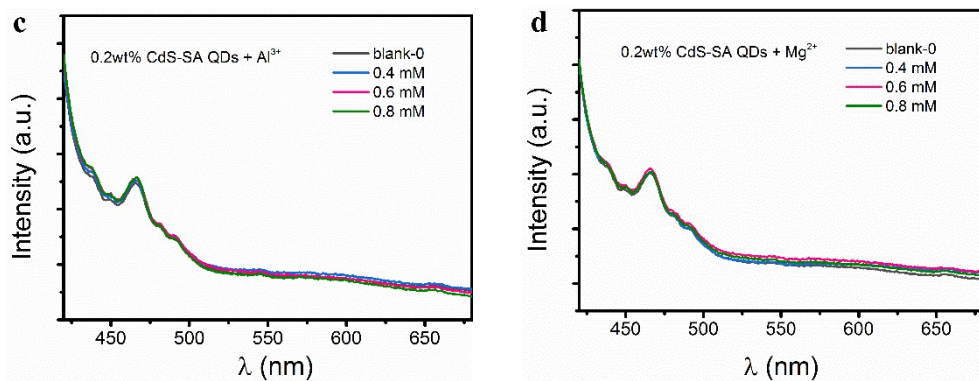

39

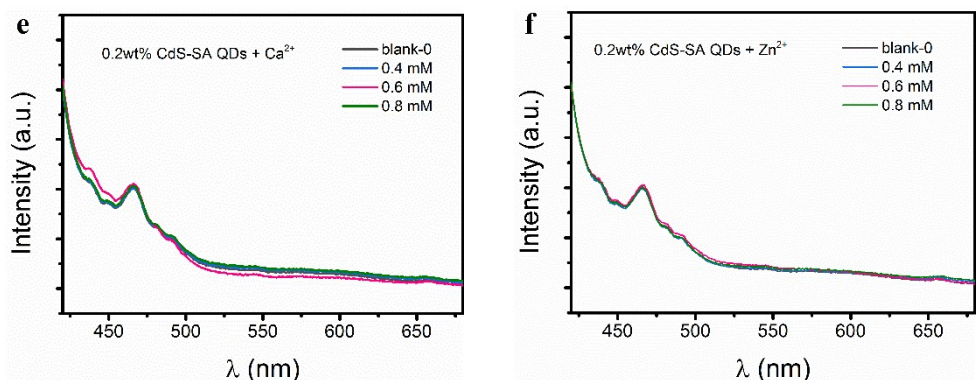

40 Fig. S2 Fluorescence spectra (excited at 400 nm) of 0.2 wt% CdS-SA solutions with  
 41 addition of (a-f)  $\text{BaCl}_2$ ,  $\text{NiCl}_2$ ,  $\text{AlCl}_3$ ,  $\text{Ca}(\text{CH}_3\text{COO})_2$ ,  $\text{Mg}(\text{CH}_3\text{COO})_2$ ,  $\text{Zn}(\text{CH}_3\text{COO})_2$   
 42 in different concentration.

43

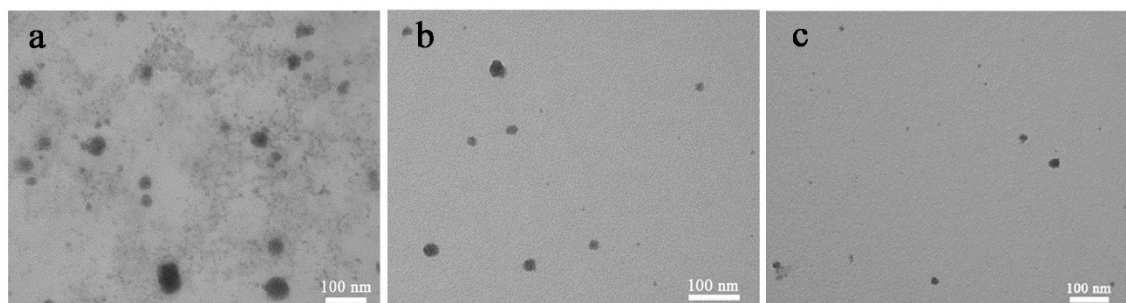

44 Fig. S3 TEM images of the 0.2 wt% CdS-SA solution with different ions added at the  
 45 concentration of 0.4 mM. (a-c,  $\text{Fe}^{3+}$ ,  $\text{Ba}^{2+}$ ,  $\text{Ni}^{2+}$ ).

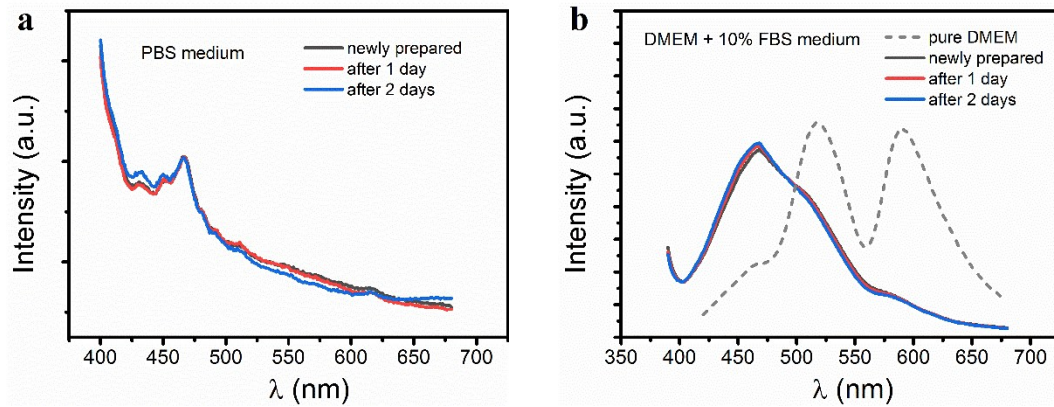

46

47 Fig. S4 Fluorescence spectra of 0.2 wt% CdS-SA QDs in different mediums (a, PBS;

48 b, DMEM + 10% FBS) measured after different time.
